# Supplementary material
Source: publisher figshare collection journal article supplement (https://gsapubs.figshare.com/ndownloader/files/23305844)
Supplement: Supplementary file 1 [file 23305844]

Archive with 2 entries (2 files):
- 2017338_Tables.xlsx
- 2017338_Methods.pdf
