# Supplementary material
Source: publisher figshare collection journal article supplement (https://gsapubs.figshare.com/ndownloader/files/23305844)
Supplement: Supplementary file 1 [file 23305844 › 2017338_Tables.xlsx]

## Sheet: data
Stowell, H.H., Schwartz, J.J., Klepeis, K.A., Hout, C., Tulloch, A.J., and Koenig, A., 2017, Sm-Nd garnet ages for granulite and eclogite in the Breaksea Orthogneiss and widespread granulite facies metamorphism of the lower crust, Fiordland magmatic arc, New Zealand: Lithosphere, doi:10.1130/L662.1.
GSA Data Repository Item 2017338
Ti47	Ti49		Y89	Y-189		Zr90	Nb93	Ba137		La139	Ce140	Pr141	Nd143	Nd146		Sm147	Eu153	Gd157	Tb159	Dy161	Ho165	Er166	Er167		Tm169	Yb171	Yb173		Lu175	Hf178	Hf180		Pb208	Th232	U238	Sm/Nd			REE
																																							La	Ce	Pr	Nd	Pm	Sm	Eu	Gd	Tb	Dy	Ho
1052.33	1000.15	1026.24	57.1958	62.9719	60.0839	24.222	0.196983	-0.383165		0.0225452	0.342981	0.142969	2.95412	2.40675	2.68044	3.24273	1.6889	8.15987	1.45122	10.6785	2.10058	6.37984	6.28278	6.33131	0.945708	6.44632	5.28184	5.86408	0.944069	0.189677	0.411495	0.300586	0.128732	-0.041162	-0.0410334	1.34735			0.0225452	0.342981	0.142969	2.68044		3.24273	1.6889	8.15987	1.45122	10.6785	2.10058
1245.24	1203.92	1224.58	58.6901	52.2448	55.4674	21.496	0.0451558	0.0952579		0.0491413	0.194237	0.206929	2.67635	2.80887	2.74261	3.54781	1.82288	8.0509	1.39683	11.1373	1.96871	6.56948	6.72934	6.64941	0.766385	7.04	5.46078	6.25039	0.819009	0.194088	0.523628	0.358858	0.0940893	-0.0761153	0.0747282	1.26307			0.0491413	0.194237	0.206929	2.74261		3.54781	1.82288	8.0509	1.39683	11.1373	1.96871
2333.33	2305.63	2319.48	60.8195	67.8457	64.3326	24.9425	-0.204914	0.542004		0.0894393	0.146287	0.111044	2.72028	2.68035	2.70032	3.29728	1.75056	8.23672	1.48702	10.599	2.22762	6.4184	6.41302	6.41571	0.994991	6.26742	5.88865	6.07803	0.973158	0.287783	0.426135	0.356959	0.0333466	0.10335	-0.0582079	1.23017			0.0894393	0.146287	0.111044	2.70032		3.29728	1.75056	8.23672	1.48702	10.599	2.22762
1269.86	1247.35	1258.6	57.7237	52.2307	54.9772	22.2586	0.109648	-0.956248		0.00161987	0.155822	0.147572	3.23983	2.58755	2.91369	3.28259	1.578	8.10915	1.50684	9.26405	2.12248	6.19861	5.76838	5.98349	0.957126	7.42183	5.81067	6.61625	0.728551	0.0783072	0.500079	0.289193	-0.0735503	0.0122141	0.0301499	1.26861			0.00161987	0.155822	0.147572	2.91369		3.28259	1.578	8.10915	1.50684	9.26405	2.12248
2224.45	2266.33	2245.39	58.9427	54.3979	56.6703	26.307	-0.0303309	0.00914041		0.0343023	0.248127	0.0876846	2.27856	2.61815	2.44835	2.7717	1.49247	7.4099	1.57901	10.5941	2.30327	6.75149	6.5427	6.6471	0.919136	7.36483	6.23474	6.79978	0.901424	0.357579	0.353875	0.355727	-0.0592488	0.0122005	0.0231667	1.05865			0.0343023	0.248127	0.0876846	2.44835		2.7717	1.49247	7.4099	1.57901	10.5941	2.30327
1207.99	1152.71	1180.35	55.9495	59.6394	57.7944	20.8475	0.0771964	-0.40055		0.0412534	0.131667	0.12572	2.25313	2.74357	2.49835	3.7145	1.48941	7.09112	1.41372	10.7458	2.11666	6.36746	6.44781	6.40763	0.935463	5.64863	5.91139	5.78001	0.976533	0.570358	0.462036	0.516197	-0.120377	0.012151	-0.0576813	1.35389			0.0412534	0.131667	0.12572	2.49835		3.7145	1.48941	7.09112	1.41372	10.7458	2.11666
1442.47	1476.52	1459.49	55.6712	54.1098	54.8905	23.7922	0.112914	0.580028		0.0121567	0.164313	0.168958	2.04563	1.89953	1.97258	3.36805	1.53416	7.26581	1.34546	9.96203	2.12387	6.42101	5.9448	6.18291	0.960852	4.6372	6.59367	5.61544	0.84278	0.0425454	0.188409	0.115477	-0.137156	0.0141573	0.00117605	1.7731			0.0121567	0.164313	0.168958	1.97258		3.36805	1.53416	7.26581	1.34546	9.96203	2.12387
						19.156	-0.0413363	2.24232
						21.7581	0.0921006	2.9128
1081.87	1053.6	1067.74	62.1512	55.2736	58.7124	23.28	-0.117754	3.68692		0.293592	0.788467	0.169741	2.47015	2.23905	2.3546	3.03348	1.45276	8.04195	1.51566	10.5928	2.35522	6.88001	6.44988	6.66494	0.984639	5.61235	6.18395	5.89815	0.897218	0.272284	0.318777	0.295531	0.0813573	-0.10898	0.0369232	1.35481			0.293592	0.788467	0.169741	2.3546		3.03348	1.45276	8.04195	1.51566	10.5928	2.35522
1229.11	1149.46	1189.29	60.072	53.0918	56.5819	22.5161	-0.096195	-0.107432		0.0242697	0.210314	0.10818	1.93278	2.06926	2.00102	3.49471	1.38873	7.86967	1.45622	9.75398	2.18023	6.7091	6.75097	6.73004	0.883544	5.26459	5.48203	5.37331	0.683181	0.143844	0.315204	0.229524	0.0530581	0.0195102	-0.0790925	1.68887			0.0242697	0.210314	0.10818	2.00102		3.49471	1.38873	7.86967	1.45622	9.75398	2.18023
1426.43	1385.83	1406.13	52.0466	57.275	54.6608	21.3698	-0.0610597	0.0106845			0.214291	0.1539	2.8721	2.58776	2.72993	2.8495	1.69822	6.91617	1.26836	9.70723	2.0277	6.02378	5.41567	5.71973	0.659273	5.80293	4.60034	5.20163	0.712929	0.354297	0.150072	0.252184	0.468176	-0.0122239	-0.0162476	1.10115			0	0.214291	0.1539	2.72993		2.8495	1.69822	6.91617	1.26836	9.70723	2.0277
1060.27	1067.47	1063.87	52.3099	52.4135	52.3617	19.9223	-0.0413494	0.820949		0.0241409	0.208716	0.113515	3.3678	2.70674	3.03727	2.89436	1.47778	6.94956	1.40206	9.84958	1.92864	5.72269	6.13047	5.92658	0.755372	5.16707	4.95402	5.06054	0.765958	0.375669	0.229805	0.302737	-0.100032	-0.0975173	0.00795889	1.06931			0.0241409	0.208716	0.113515	3.03727		2.89436	1.47778	6.94956	1.40206	9.84958	1.92864
3012.23	2997.84	3005.04	54.3229	66.7561	60.5395	24.6448	-0.11858	-0.0428835		0.0561734	0.0397198	0.0165568	2.37024	2.75354	2.56189	3.63822	1.49453	8.2928	1.51571	12.7308	2.24148	6.9374	6.25286	6.59513	0.526765	8.48275	5.0135	6.74813	0.866464	0.0786365	0.283451	0.181044	-0.0222374	0.318903	0.173898	1.32129			0.0561734	0.0397198	0.0165568	2.56189		3.63822	1.49453	8.2928	1.51571	12.7308	2.24148
1250.18	1253.91	1252.04	58.2354	68.4208	63.3281	25.7519	-0.0300426	-0.742419		0.0246816	0.139659	0.172093	2.19264	2.32405	2.25835	3.378	1.72927	8.24057	1.33023	10.6664	2.1087	6.11057	6.79591	6.45324	0.8247	5.51093	5.57076	5.54085	0.903782	0.253189	0.218007	0.235598	-0.0422541	0	0.0447465	1.4535			0.0246816	0.139659	0.172093	2.25835		3.378	1.72927	8.24057	1.33023	10.6664	2.1087
1171.32	1107.26	1139.29	59.5097	62.2337	60.8717	24.7888	0.214319	-0.362193			0.120745	0.139176	3.1802	2.73478	2.95749	3.97218	1.64084	8.20495	1.42835	10.7727	2.32751	6.44093	6.52516	6.48304	1.03212	4.83329	6.19857	5.51593	0.841256	0.243255	0.14778	0.195518	0.0324623	-0.0102316	-0.0577979	1.45246			0	0.120745	0.139176	2.95749		3.97218	1.64084	8.20495	1.42835	10.7727	2.32751
1072.67	1004.42	1038.54	59.2905	60.2788	59.7847	22.6171	-0.0191619	0.147256		0.0683871	0.149354	0.140979	3.10723	2.60926	2.85825	3.72292	1.58028	6.84134	1.48538	10.9447	2.24045	6.42186	7.07673	6.7493	0.845928	6.42138	6.5276	6.47449	0.890174	0.356071	0.361936	0.359003	0.116788	-0.0198211	-0.00658619	1.42681			0.0683871	0.149354	0.140979	2.85825		3.72292	1.58028	6.84134	1.48538	10.9447	2.24045
1098.35	1067.13	1082.74	56.0609	56.558	56.3095	23.0077	-0.00944593	2.74123			0.484165	0.153696	2.8889	3.23923	3.06406	3.30376	1.57129	7.32447	1.32315	10.466	2.12972	6.40576	6.06164	6.2337	0.942525	6.48843	6.25558	6.37201	0.950147	0.418893	0.707588	0.563241	0.647643	0.0708333	0.0633073	1.01992			0	0.484165	0.153696	3.06406		3.30376	1.57129	7.32447	1.32315	10.466	2.12972
1151.06	1092.2	1121.63	61.3829	61.6367	61.5098	22.9028	0.0787385	0.0649967		0.00558845	0.206738	0.144226	1.75607	1.99682	1.87644	3.40502	1.54566	7.77321	1.51504	11.7244	2.44813	7.2512	7.64298	7.44709	0.978402	7.06736	6.43269	6.75003	1.08757	0.215674	0.273992	0.244833	0.113152	0.0230169	0.0164737	1.70522			0.00558845	0.206738	0.144226	1.87644		3.40502	1.54566	7.77321	1.51504	11.7244	2.44813
1207.51	1157.44	1182.48	60.8934	61.4438	61.1686	24.087	0.155248	0.631616		0.00496921	0.110004	0.116721	2.36789	2.05512	2.2115	2.97004	1.46367	8.16925	1.48955	10.4171	2.39661	6.9458	6.99305	6.96943	1.00814	5.88461	6.51696	6.20079	0.982898	0.257384	0.314773	0.286078	5.82311e-07	0.0535278	0.0355737	1.44519			0.00496921	0.110004	0.116721	2.2115		2.97004	1.46367	8.16925	1.48955	10.4171	2.39661
1084.3	1042.23	1063.26	56.5366	50.2737	53.4051	20.3167	0.0936309	30.3594		0.0740599	0.168671	0.0828374	2.18226	2.13622	2.15924	3.02111	1.47838	7.13309	1.3252	10.6306	2.08823	6.33047	5.79264	6.06156	0.838945	6.33905	6.22847	6.28376	0.891969	-0.0118399	0.417617	0.202888	0.493281	0.106698	0.00109114	1.41423			0.0740599	0.168671	0.0828374	2.15924		3.02111	1.47838	7.13309	1.3252	10.6306	2.08823
1117.25	1052.35	1084.8	58.7965	60.2036	59.5001	21.7769	-0.0499959	17.7468			0.246837	0.117962	2.75372	2.2003	2.47701	2.83097	1.47793	6.42598	1.49943	10.3082	2.08637	6.64816	6.85114	6.74965	0.947555	6.02864	5.3829	5.70577	1.04578	0.203207	0.171415	0.187311	0.51718	0.0333638	0.0365857	1.28663			0	0.246837	0.117962	2.47701		2.83097	1.47793	6.42598	1.49943	10.3082	2.08637
950.252	941.666	945.959	62.6967	66.984	64.8404	19.3628	0.0236435	7.24198		0.0385959	0.155673	0.100126	2.37316	2.26494	2.31905	3.15649	1.31533	7.29661	1.55069	9.31381	2.33799	6.47123	7.56193	7.01658	0.962705	6.56085	6.3926	6.47673	1.04198	-0.0209988	0.296281	0.137641	-0.180522	0.012228	-0.00696561	1.39363			0.0385959	0.155673	0.100126	2.31905		3.15649	1.31533	7.29661	1.55069	9.31381	2.33799
						9.38414	-0.312376
						9.20667	0.26695
734.97	729.465	732.218	60.1458	57.9263	59.036	16.8315	0.24099	1.25699		0.0666255	0.580856	0.0849032	1.66137	1.89743	1.7794	3.64775	1.61867	6.41616	1.42417	9.60508	2.34464	6.46742	5.63185	6.04963	0.887008	7.68185	6.76121	7.22153	1.10274	0.210743	0.405252	0.307997	0.115465	0.142441	0.0819211	1.92247			0.0666255	0.580856	0.0849032	1.7794		3.64775	1.61867	6.41616	1.42417	9.60508	2.34464
1025.42	943.325	984.373	57.1097	72.111	64.6104	21.3871	-0.175153	-0.791776		0.736301	2.72293	0.369976	1.59352	3.26861	2.43107	1.87562	1.26891	5.5498	1.39111	9.97205	2.7131	8.07758	7.92011	7.99885	0.926293	8.16816	8.42812	8.29814	1.13954	0.274252	0.299059	0.286655	1.17701	0.523391	0.173918	0.573829			0.736301	2.72293	0.369976	2.43107		1.87562	1.26891	5.5498	1.39111	9.97205	2.7131
1034.35	1036.34	1035.35	64.723	53.442	59.0825	23.8551	0.0461827	1.57271		0.0236515	0.222124	0.158727	1.97414	1.67484	1.82449	2.95615	1.45669	6.5878	1.31372	11.1151	2.37644	7.46341	7.77219	7.6178	1.04793	6.54591	7.92658	7.23625	1.29247	0.263725	0.387691	0.325708	-0.0108258	-0.0769621	-0.0511478	1.76504			0.0236515	0.222124	0.158727	1.82449		2.95615	1.45669	6.5878	1.31372	11.1151	2.37644
						23.5182
1043.37	989.394	1016.38	64.0433	63.4057	63.7245	23.022	-0.0622829	1.93583		0.273493	0.618063	0.141563	2.36339	2.24363	2.30351	3.15713	1.29149	7.24614	1.62828	11.9372	2.23013	7.71515	8.07478	7.89497	1.1921	7.64967	8.11341	7.88154	1.15791	0.446518	0.143346	0.294932	0.049719	-0.010447	-0.0138858	1.40715			0.273493	0.618063	0.141563	2.30351		3.15713	1.29149	7.24614	1.62828	11.9372	2.23013
1230.9	1198.7	1214.8	67.619	72.0144	69.8167	25.2971	-0.0432164	1.62695		0.0335305	0.226826	0.140363	2.68725	2.5615	2.62438	3.64465	1.76426	7.91475	1.65306	12.2896	2.41397	7.25199	7.22621	7.2391	1.20163	7.86289	8.94591	8.4044	1.11758	0.32958	0.405097	0.367339	0.0656457	0.0125164	0.0237664	1.42285			0.0335305	0.226826	0.140363	2.62438		3.64465	1.76426	7.91475	1.65306	12.2896	2.41397
856.821	885.738	871.28	65.3878	60.6686	63.0282	26.252	-0.0609069	5.14721		0.382314	0.558152	0.136343	3.67085	2.65219	3.16152	2.6139	1.76562	7.7775	1.60449	11.6353	2.32988	8.06253	7.43941	7.75097	1.03893	5.5275	6.61596	6.07173	1.04475	0.193982	0.472075	0.333028	0.383239	-0.0630001	-0.0110181	0.985564			0.382314	0.558152	0.136343	3.16152		2.6139	1.76562	7.7775	1.60449	11.6353	2.32988
3519.06	3501.71	3510.38	73.7184	83.9247	78.8216	33.9421	0.148821	0.908202		0.15005	0.334326	0.122878	2.8224	2.5472	2.6848	3.9735	1.23784	8.58364	1.51193	12.3842	2.4604	8.16254	8.92461	8.54358	1.17266	6.64421	6.57303	6.60862	1.10612	0.154205	0.339461	0.246833	0.425172	0.00962097	0.0543486	1.55995			0.15005	0.334326	0.122878	2.6848		3.9735	1.23784	8.58364	1.51193	12.3842	2.4604
1489.36	1426.46	1457.91	67.7837	68.9813	68.3825	25.2633	0.0762815	1.14693		0.011465	0.147732	0.138123	2.34624	3.14872	2.74748	3.4514	1.5937	7.83465	1.54043	11.1957	2.29768	7.71323	7.17952	7.44637	1.05507	6.47655	7.79449	7.13552	1.16357	0.501739	0.415152	0.458446	0.0466471	0.0566045	0.0159594	1.09613			0.011465	0.147732	0.138123	2.74748		3.4514	1.5937	7.83465	1.54043	11.1957	2.29768
1040.81	961.268	1001.04	66.8431	61.9996	64.4213	25.2414	-0.104981	11.4936			0.285309	0.119734	2.73287	2.61258	2.67273	4.23871	1.66	8.02364	1.46798	11.4793	2.61087	7.44507	7.97087	7.70797	1.12734	7.07997	6.58236	6.83117	1.18536	0.343948	0.333951	0.338949	0.0492186	-0.087905	-0.123713	1.62242			0	0.285309	0.119734	2.67273		4.23871	1.66	8.02364	1.46798	11.4793	2.61087
1067.08	1056.07	1061.58	66.6393	61.8204	64.2298	23.8796	-0.0526224	1.36282		0.623324	1.04186	0.297273	2.78804	2.56029	2.67416	3.46499	1.42418	7.99494	1.5907	11.7332	2.62276	7.15377	6.88874	7.02125	1.13639	7.74225	7.46513	7.60369	1.05473	0.23077	0.306499	0.268634	0.265014	-0.0210701	0.0851848	1.35336			0.623324	1.04186	0.297273	2.67416		3.46499	1.42418	7.99494	1.5907	11.7332	2.62276
1142.06	1249	1195.53	67.3814	56.8429	62.1122	27.3773	-0.10311	1.02543		0.0194546	0.14752	0.159706	2.65305	2.71789	2.68547	2.99707	1.54568	8.94559	1.55425	12.2322	2.52395	7.41585	7.86952	7.64268	1.05761	7.03126	7.80115	7.4162	1.32924	0.487341	0.347469	0.417405	0.122125	0.0729733	0.0808285	1.10272			0.0194546	0.14752	0.159706	2.68547		2.99707	1.54568	8.94559	1.55425	12.2322	2.52395
1312.72	1271.64	1292.18	75.4787	80.4673	77.973	30.6337	-0.0502266	0.751985		0.0937586	0.291573	0.123644	2.16516	3.08506	2.62511	3.85295	1.61619	8.40061	1.847	12.9147	2.68876	7.83069	8.23487	8.03278	1.0274	8.88496	6.66195	7.77345	1.22595	0.512944	0.502969	0.507956	0.534061	0.0540309	0.00138108	1.24891			0.0937586	0.291573	0.123644	2.62511		3.85295	1.61619	8.40061	1.847	12.9147	2.68876
1569.21	1476.98	1523.1	58.2899	70.4863	64.3881	26.3627	0.0557103	2.26652		0.0237756	0.25778	0.138119	1.63233	2.04596	1.83914	2.80186	1.46419	7.32695	1.4239	10.4049	2.23923	5.4803	6.4463	5.9633	1.02569	7.00048	6.84749	6.92399	1.03715	0.102623	0.14268	0.122651	0.0435311	-0.0928395	0.055317	1.36946			0.0237756	0.25778	0.138119	1.83914		2.80186	1.46419	7.32695	1.4239	10.4049	2.23923
1198.73	1140.47	1169.6	69.8279	74.6169	72.2224	26.839	-0.087179	0.926897		0.0210956	0.239227	0.164608	2.64116	2.03976	2.34046	4.16133	1.56821	8.02447	1.68043	10.9326	2.68075	7.74064	7.45595	7.59829	1.1294	7.6892	8.27748	7.98334	1.20949	0.406136	0.241136	0.323636	-0.0613076	-0.0342663	0.0707159	2.04011			0.0210956	0.239227	0.164608	2.34046		4.16133	1.56821	8.02447	1.68043	10.9326	2.68075
1277.05	1249.84	1263.44	69.606	66.6417	68.1239	25.5772	0.00344683	1.22463		0.0781072	0.216801	0.114388	1.92155	1.83216	1.87685	3.34417	1.2791	8.11853	1.71687	12.1379	2.45377	7.87293	7.21654	7.54474	0.951096	7.46455	7.59432	7.52943	1.22547	0.181425	0.230613	0.206019	0.222993	0.13904	0.0852957	1.82526			0.0781072	0.216801	0.114388	1.87685		3.34417	1.2791	8.11853	1.71687	12.1379	2.45377
564.061	563.556	563.809	69.6002	71.1024	70.3513	21.3396	-0.0105785	0.478198		0.164559	0.658941	0.155941	2.16756	2.83861	2.50309	3.45758	1.39731	9.05797	1.52584	11.8214	2.49995	7.6624	6.59372	7.12806	1.06124	7.77889	7.5235	7.65119	1.17652	0.135919	0.223516	0.179717	0.128947	0	0.0242397	1.21805			0.164559	0.658941	0.155941	2.50309		3.45758	1.39731	9.05797	1.52584	11.8214	2.49995
4004.94	4062.36	4033.65	65.9986	64.2424	65.1205	38.2943	0.24775	4.12515		0.131506	0.46946	0.16825	2.28093	1.56152	1.92123	3.40013	1.51722	8.03893	1.49998	10.4837	2.44484	7.26038	7.99637	7.62838	1.03789	7.56606	7.80314	7.6846	1.01281	0.440692	0.317259	0.378975	0.394435	0.13881	0.123001	2.17744			0.131506	0.46946	0.16825	1.92123		3.40013	1.51722	8.03893	1.49998	10.4837	2.44484
1425.75	1462.63	1444.19	66.8017	72.3596	69.5807	27.2608	0.0929722	3.68258		0.124649	0.446791	0.253785	1.83344	2.31923	2.07633	3.69657	1.56313	8.72442	1.60033	11.2544	2.49521	6.83725	8.23536	7.5363	1.0353	7.83029	6.47473	7.15251	1.09843	0.334447	0.352674	0.343561	0.384889	0.00181407	0.05547	1.59388			0.124649	0.446791	0.253785	2.07633		3.69657	1.56313	8.72442	1.60033	11.2544	2.49521
922.412	986.48	954.446	66.6234	67.2198	66.9216	22.8807	0.0343563	0.461262		0.0913836	0.186564	0.108764	2.84415	2.71031	2.77723	3.69434	1.44736	7.3247	1.55974	10.3954	2.40451	7.25275	7.2257	7.23922	0.944246	7.23111	6.88522	7.05816	1.21615	0.280522	0.238675	0.259598	0.285099	-0.0568592	0.00118086	1.36307			0.0913836	0.186564	0.108764	2.77723		3.69434	1.44736	7.3247	1.55974	10.3954	2.40451
1668.85	1676.57	1672.71	69.9071	69.0802	69.4937	26.3406	0.13671	4.5628		0.0531748	0.20366	0.102319	1.86913	2.40676	2.13794	3.10136	1.54976	7.68432	1.45531	11.3697	2.55027	6.89205	6.40147	6.64676	1.06883	7.96077	6.93295	7.44686	1.08947	0.228085	0.404423	0.316254	0.301814	0.418891	0.108253	1.28861			0.0531748	0.20366	0.102319	2.13794		3.10136	1.54976	7.68432	1.45531	11.3697	2.55027
1177.3	1151.67	1164.48	70.1706	69.4667	69.8186	26.2541	-0.121255	-0.0810279		0.0732352	0.17591	0.149768	2.64715	2.60542	2.62629	4.09707	1.57638	8.69026	1.66276	11.014	2.63793	7.8925	7.6779	7.7852	1.18887	6.57261	7.08173	6.82717	1.06765	0.691938	0.405062	0.5485	-0.0296593	-0.0581665	0.00845612	1.57252			0.0732352	0.17591	0.149768	2.62629		4.09707	1.57638	8.69026	1.66276	11.014	2.63793
1669.07	1730.57	1699.82	67.9407	67.788	67.8644	26.7891	-0.0649454	0.129795		0.00820565	0.141028	0.106835	2.78032	2.84643	2.81337	3.62561	1.62268	7.93734	1.64392	11.1619	2.44197	8.08389	6.95894	7.52142	0.993934	6.9859	7.09181	7.03885	1.12975	0.178509	0.329383	0.253946	0.0649028	0.114909	0.0469947	1.27374			0.00820565	0.141028	0.106835	2.81337		3.62561	1.62268	7.93734	1.64392	11.1619	2.44197
1060.1	987.938	1024.02	66.3072	70.8057	68.5565	24.6482	0.207846	-0.452921		0.0474222	0.165812	0.151114	3.84395	3.02183	3.43289	3.70505	1.70727	7.72152	1.57634	11.1055	2.48367	7.81367	7.58177	7.69772	1.1507	7.45227	6.91105	7.18166	1.11023	0.508042	0.196776	0.352409	0.0524684	0	0.0476261	1.22609			0.0474222	0.165812	0.151114	3.43289		3.70505	1.70727	7.72152	1.57634	11.1055	2.48367
1106.75	1096.39	1101.57	67.4102	65.802	66.6061	24.1213	-0.0324772	6.8122		0.0194048	0.243724	0.0645323	3.63478	3.14681	3.3908	3.77873	1.45737	7.00538	1.58142	13.3621	2.46673	7.76741	7.25811	7.51276	0.997777	6.8267	7.20897	7.01783	1.18962	0.122644	0.347732	0.235188	0.00253824	-0.0223957	-0.222017	1.20081			0.0194048	0.243724	0.0645323	3.3908		3.77873	1.45737	7.00538	1.58142	13.3621	2.46673
787.859	800.325	794.092	64.4779	68.3545	66.4162	21.1804	-0.236112	0.191164		0.0189501	0.189662	0.156415	2.77943	2.61386	2.69665	3.77796	1.52237	8.68564	1.4573	12.681	2.78032	7.46686	7.58081	7.52384	1.05007	8.29152	8.49279	8.39216	1.02873	0.232238	0.106049	0.169144	0.131348	-0.0109355	0.0872108	1.44536			0.0189501	0.189662	0.156415	2.69665		3.77796	1.52237	8.68564	1.4573	12.681	2.78032
2256.94	2226.31	2241.63	67.9967	63.8888	65.9428	28.1871	0.0598649	0.46801		0.0145403	0.169107	0.201687	2.41909	3.49765	2.95837	3.38051	1.50763	7.75077	1.59307	11.5573	2.35392	7.64596	7.39888	7.52242	1.15065	8.13258	7.94737	8.03998	1.17197	0.28753	0.499421	0.393476	-0.141158	0.0710284	-0.0617288	0.966509			0.0145403	0.169107	0.201687	2.95837		3.38051	1.50763	7.75077	1.59307	11.5573	2.35392
1274.84	1185.73	1230.28	62.5424	74.1446	68.3435	24.1721	-0.0639208	6.40069		0.0895804	0.254393	0.173118	3.0621	2.83005	2.94608	3.35053	1.53942	8.40442	1.41251	11.0019	2.29327	6.87427	6.60156	6.73792	1.04293	7.00076	7.76017	7.38047	0.97602	0.179008	0.28317	0.231089	-0.153079	-0.0553954	-0.0676919	1.18391			0.0895804	0.254393	0.173118	2.94608		3.35053	1.53942	8.40442	1.41251	11.0019	2.29327
857.023	909.809	883.416	68.0275	68.9025	68.465	24.3486	0.0127116	0.236413			0.109136	0.166465	3.38486	3.3714	3.37813	3.61232	1.69761	7.98344	1.69063	11.3019	2.43628	7.77757	6.98083	7.3792	1.00983	8.01201	6.8046	7.40831	1.1573	0.38385	0.395317	0.389583	-0.178785	0.0732547	-0.183501	1.07146			0	0.109136	0.166465	3.37813		3.61232	1.69761	7.98344	1.69063	11.3019	2.43628
1455.55	1275.76	1365.66	68.0679	74.9355	71.5017	24.9553	0.0345833	3.18199		0.163998	0.368086	0.257152	3.57808	3.01974	3.29891	2.89514	1.32267	8.7332	1.70375	11.7812	2.37728	7.43321	7.50343	7.46832	1.1001	6.37465	6.95096	6.6628	1.07684	0.38591	0.202693	0.294302	0.53505	0.0440268	-0.0182872	0.95874			0.163998	0.368086	0.257152	3.29891		2.89514	1.32267	8.7332	1.70375	11.7812	2.37728
912.205	916.369	914.287	68.7413	61.3933	65.0673	23.9578	0.190553	-0.42937		0.001126	0.137098	0.238039	3.68533	3.01242	3.34888	2.27615	1.5562	8.25382	1.68953	11.6246	2.61698	7.63489	8.82246	8.22868	1.01566	7.95219	7.76085	7.85652	1.21505	0.102065	0.204596	0.15333	-0.111327	-0.121293	0.116884	0.755589			0.001126	0.137098	0.238039	3.34888		2.27615	1.5562	8.25382	1.68953	11.6246	2.61698
1606.04	1531.25	1568.65	68.7163	68.0738	68.3951	24.1843	-0.101233	-0.588372		0.00138867	0.133797	0.201829	1.49978	3.06755	2.28367	3.38072	1.50536	8.82098	1.51216	11.6173	2.61923	7.66569	7.69073	7.67821	1.01048	8.67858	7.11462	7.8966	1.12103	0.344658	0.377331	0.360994	0.0839042	-0.0224381	0.00124268	1.10209			0.00138867	0.133797	0.201829	2.28367		3.38072	1.50536	8.82098	1.51216	11.6173	2.61923
1160.36	1198.15	1179.26	68.8327	66.6405	67.7366	25.2233	-0.102092	0.257472		0.0368055	0.155063	0.25422	3.19194	2.81703	3.00449	4.34265	1.55389	8.33847	1.64088	11.8733	2.49016	7.63954	7.40499	7.52227	1.00872	9.26897	8.31486	8.79191	1.21256	0.0846284	0.514914	0.299771	0.0503829	0.0963381	-0.0935744	1.54157			0.0368055	0.155063	0.25422	3.00449		4.34265	1.55389	8.33847	1.64088	11.8733	2.49016
1168.94	1232.28	1200.61	68.7286	66.5385	67.6335	24.4932	-0.0316932	0.716346		0.0422684	0.123174	0.10439	2.88766	3.26168	3.07467	4.0822	1.65337	8.02779	1.42724	11.6108	2.48083	7.23321	7.87296	7.55309	1.10076	7.36085	7.28381	7.32233	0.983254	0.645124	0.180379	0.412751	0.146111	0.142058	0.00847264	1.25156			0.0422684	0.123174	0.10439	3.07467		4.0822	1.65337	8.02779	1.42724	11.6108	2.48083
1057.68	1002.03	1029.85	68.8672	59.0256	63.9464	26.2548	0.0834441	0.767534		0.0435469	0.167913	0.14174	3.28736	3.32131	3.30434	3.56922	1.64073	7.47617	1.62763	11.8632	2.50614	7.44428	7.9767	7.71049	1.12602	7.20094	7.35621	7.27857	1.07883	0.315777	0.123115	0.219446	0.00255135	-0.011258	-0.0149638	1.07464			0.0435469	0.167913	0.14174	3.30434		3.56922	1.64073	7.47617	1.62763	11.8632	2.50614
1685.99	1669.96	1677.98	68.0261	67.6834	67.8548	25.065	-0.00909795	0.00987029		0.0167739	0.170544	0.168564	2.88564	2.59845	2.74204	3.03841	1.57865	7.5529	1.62337	11.8675	2.48554	8.15305	7.17356	7.6633	1.14241	6.65895	5.68757	6.17326	1.12488	0.393684	0.532438	0.463061	-0.294317	0.0489362	-0.00750513	1.16932			0.0167739	0.170544	0.168564	2.74204		3.03841	1.57865	7.5529	1.62337	11.8675	2.48554
1267.65	1216.92	1242.29	63.8784	65.0474	64.4629	25.5676	0.0477022	0.0718773		0.0491985	0.214069	0.191559	2.44224	3.18071	2.81148	3.81105	1.56117	8.37704	1.41685	10.6678	2.39118	7.62327	7.55319	7.58823	1.00243	7.17772	6.50189	6.83981	0.968224	0.475972	0.382349	0.429161	0.437342	0.0603065	0.0789426	1.19817			0.0491985	0.214069	0.191559	2.81148		3.81105	1.56117	8.37704	1.41685	10.6678	2.39118
1270.42	1358.47	1314.45	61.2623	64.6216	62.942	25.5009	-0.0346188	-0.148257		0.0286935	0.171123	0.131802	3.13081	2.82953	2.98017	4.08818	1.56989	9.3238	1.49558	10.4519	2.24215	6.60617	6.65453	6.63035	0.960397	6.42671	5.65552	6.04112	1.08979	0.522589	0.319654	0.421121	0.0666296	-0.0716172	-0.127757	1.44483			0.0286935	0.171123	0.131802	2.98017		4.08818	1.56989	9.3238	1.49558	10.4519	2.24215
1229.34	1255.96	1242.65	64.2105	56.0063	60.1084	23.945	0.118396	0.177853			0.247805	0.11386	2.60125	3.25966	2.93046	3.55041	1.73915	7.68013	1.5892	9.72835	2.23113	6.90732	6.5004	6.70386	0.747593	5.80709	6.78253	6.29481	1.0489	0.0739853	0.34288	0.208433	0.153713	0.048986	0.00125213	1.0892			0	0.247805	0.11386	2.93046		3.55041	1.73915	7.68013	1.5892	9.72835	2.23113
1466.07	1451.26	1458.66	59.2495	55.6702	57.4598	23.6818	-0.0222606	0.427663		0.0131813	0.268856	0.187383	3.37508	2.98816	3.18162	3.81865	1.46133	8.12171	1.53391	10.3579	2.14026	6.97929	6.04517	6.51223	0.767927	6.63503	6.30237	6.4687	0.751338	0.310615	0.225668	0.268142	-0.0313085	0.0748317	-0.0892626	1.27793			0.0131813	0.268856	0.187383	3.18162		3.81865	1.46133	8.12171	1.53391	10.3579	2.14026
1220.27	1095.51	1157.89	58.4911	54.746	56.6186	23.7417	0.1193	0.294159			0.146709	0.0771713	3.38671	3.33796	3.36234	3.41759	1.84426	7.14694	1.43311	10.2947	2.36059	6.45256	6.84499	6.64877	0.87994	6.68584	5.13894	5.91239	0.797288	-0.0134851	0.033563	0.0100389	-0.144912	0.0373941	-0.0782816	1.02386			0	0.146709	0.0771713	3.36234		3.41759	1.84426	7.14694	1.43311	10.2947	2.36059
1210.22	1287.94	1249.08	57.5156	57.7034	57.6095	22.3197	0.111821	-0.233301		0.00759888	0.133312	0.139964	2.83795	3.28218	3.06007	3.56561	1.62567	7.12905	1.39338	10.4014	2.12226	6.35436	6.28304	6.3187	0.87898	6.43072	6.22508	6.3279	0.572747	0.429242	0.309519	0.369381	-0.0290353	0.0462657	-0.0224693	1.08636			0.00759888	0.133312	0.139964	3.06007		3.56561	1.62567	7.12905	1.39338	10.4014	2.12226
1217.23	1164.42	1190.82	59.8581	69.0912	64.4746	21.961	0.176355	0.863911			0.183962	0.151917	2.58508	3.29483	2.93996	3.67912	1.66462	7.43285	1.44429	10.3951	2.18213	6.21611	7.06994	6.64303	0.935785	5.69248	6.09106	5.89177	0.883873	0.313259	0.309943	0.311601	0.134144	-0.214059	-0.0779337	1.11663			0	0.183962	0.151917	2.93996		3.67912	1.66462	7.43285	1.44429	10.3951	2.18213
1437.11	1453.43	1445.27	59.9819	65.3507	62.6663	25.4336	-0.0212702	-0.389414		0.0183821	0.0883736	0.107087	2.39046	2.99899	2.69473	3.7448	1.90138	8.02531	1.4623	9.93207	2.16529	6.13911	6.41076	6.27494	0.810688	5.76826	6.1859	5.97708	0.881324	0.195419	0.0919275	0.143673	0.149581	0.084338	-0.0536128	1.24869			0.0183821	0.0883736	0.107087	2.69473		3.7448	1.90138	8.02531	1.4623	9.93207	2.16529
1162.96	1102.7	1132.83	58.7541	61.3276	60.0408	20.781	0.034369	0.341798		0.13421	0.152757	0.188874	2.32672	2.86561	2.59616	3.49014	1.52803	7.37225	1.3123	10.0631	2.21967	6.73753	5.80589	6.27171	0.674612	7.18473	6.06148	6.62311	0.743786	0.167772	0.308077	0.237925	0.408196	-0.0592495	0.0288762	1.21794			0.13421	0.152757	0.188874	2.59616		3.49014	1.52803	7.37225	1.3123	10.0631	2.21967
1346.21	1339.99	1343.1	60.2852	59.0639	59.6746	23.9069	-0.0848944	0.204672		0.0389479	0.181827	0.101818	2.27731	2.45245	2.36488	4.25687	1.58389	7.92829	1.55024	10.1171	2.21207	6.08803	7.49787	6.79295	0.829525	6.53325	6.68292	6.60809	0.855281	0.0879652	0.298957	0.193461	-0.159205	-0.0585417	-0.118339	1.73576			0.0389479	0.181827	0.101818	2.36488		4.25687	1.58389	7.92829	1.55024	10.1171	2.21207
945.89	1003.86	974.875	62.4763	62.7189	62.5976	20.595	-0.100568	-0.421111			0.156496	0.088116	2.77881	2.00274	2.39077	3.64151	1.55536	7.60288	1.50096	10.3933	2.24991	6.89676	7.03655	6.96665	0.820608	7.42689	6.34593	6.88641	0.8828	0.17404	0.0700391	0.12204	0.210927	-0.0218995	0.0157669	1.81827			0	0.156496	0.088116	2.39077		3.64151	1.55536	7.60288	1.50096	10.3933	2.24991
										La	Ce	Pr	Nd	Nd		Sm	Eu	Gd	Tb	Dy	Ho	Er	Er		Tm	Yb	Yb		Lu
										0.237	0.613	0.0928	0.457	0.457		0.148	0.0563	0.199	0.0361	0.246	0.0546	0.16	0.16		0.0247	0.161	0.161		0.0246	Chondrite values [McDonough & Sun, 1995]
										0.367	0.957	0.137	0.711	0.711		0.231	0.087	0.306	0.058	0.381	0.0851	0.249	0.249		0.0356	0.248	0.248		0.0381	Evensen et al. 1978
822.068	782.445
1139.78	1115.68									McDonough, W.F. and Sun, S.S., 1995, The Composition of the Earth; Chemical Geology, v. 120, p. 223-253.
1156.43	1199.63									Chondrite normalizing factors
1057.88	1107.58									1	2	3	4	5		6	7	8	9	10	11	12	12		14	15
1129.29	1035.85									La	Ce	Pr	Nd	Pm		Sm	Eu	Gd	Tb	Dy	Ho	Er	Tm		Yb	Lu
1358.1	1246.26									0.237	0.613	0.0928	0.457	0.260069		0.148	0.0563	0.199	0.0361	0.246	0.0546	0.16	0.0247		0.161	0.0246
2970.78	2989.9
1345.91	1362.94
1681.47	1695.36
1686.32	1611.53
1175.32	1165.28
598.131	560.329
654.989	622.537
1180.38	1339.76
1452.28	1412.59
1530.5	1513.97
1247.6	1188.61
1261.28	1291.57
1379.54	1308.32
1341.71	1306.77
1074.35	1029.95
922.02	860.385
1085.67	1146.96
1232.37	1231.7
1020.61	1000.79
733.862	847.612
881.007	852.952
1003.07	1016.87
960.651	975.721
1255.85	1320.92
909.424	884.592
1144.76	1180.85
3571.02	3552.85
567.521	580.076
720.829	752.053
1217.45	1202.75
1115.44	1034.01
880.789	896.632
1401.15	1437.45
1178.48	1172.4
733.651	722.895
791.641	768.038
1295.27	1395.71
3570.72	3496.65
1343.86	1223.7
741.531	706.778
942.879	954.359
806.981	759.705
795.625	732.211
897.279	897.976
1906.43	1994.39
979.016	922.024
1507.8	1518.85
1076.92	1009.69
1058.23	985.518
1964.56	2041.65
1141.75	1107.07
1139.83	1165.84
1307.65	1318.71
1135.74	1100.92
2322.82	2332.79
1388.34	1457.51
1215.04	1240.03
1402.46	1325.43
1315.52	1312.73
1341.47	1351.05
1362.18	1385.6
1592.16	1542.51
1244.81	1291.47
1140.42	1253.36
1034.86	981.548
806.472	823.618
874.654	828.283
1155.28	1310
1826.89	1744.9
2079.8	2029.53
2387.32	2461.22
1359.93	1356.38
1484.45	1499.32
1076.71	1127.48
1322.59	1429.16
1107.13	1121.04
1548.71	1429.49
1247.67	1215.65
805.56	773.82
660.808	640.179
1097.42	1072.45
1060.31	1116.48
1911.77	1849.6
3138.22	3033.89
1763.39	1809.75
1246.37	1149.77
1301.55	1300.67
1122.98	1117.33
2025.73	2018.13
1322.35	1300.25
1490.65	1420.23
1365.25	1348.34
1311.08	1370.84
1128.9	1146.5
1206.26	1194.21
1314.16	1252.44
1175.05	1210.76
1460.66	1353.15
1021.69	1000.46
1201.02	1121.26
1691.92	1748.65
2188.97	2095.6
1190.07	1182.26
1038.64	1089.64
1978.66	1944.4
2696.14	2727.66
1267.32	1238.84
1129.05	1155.56
1041.71	1032.7
811.134	715.383
802.757	770.243
943.845	925.81
1384.02	1250.37
463.903	465.253
684.889	609.816
1222.4	1189.79
2867.82	2686.18
665.684	663.03
1350.33	1341.3
1496.61	1544.49
1062.72	1008.24
918.215	987.691
2282.32	2125.66
944.268	908.448
1375.28	1289.07
1396.94	1384.83
1489	1429.46
1201.44	1170.31
1377.89	1386.38
1165.56	1048.5
1111.42	1111.29
1255.25	1256.66
1213.99	1303.09
1473.82	1454.17
1915.29	1882.9
1209.36	1238.44
1252.64	1230.7
1189.47	1263.68
1169.32	1127.09
993.541	995.55
1038.71	1045.74
1125.5	1094.85
1288.48	1167.21
1269.64	1222.13
1092.54	1026.02
1047.07	1060.01
1030.38	1020.2
1358.56	1378.84
1136.65	1050.58
1941.75	1901.65
1254.99	1207.47
1465.72	1393.73
1278	1245.74
1205.07	1192.56
530.38	633.126
979.851	980.861
1085.2	1061.87
1789.85	1675.79
1504.93	1427.32
941.488	941.172
1277.41	1254.73
1253.97	1278.24
1221.34	1249.27
1296.97	1289.64
1654.39	1582.42
1189.45	1173.11
1335.19	1334.86
1843.31	1802.39
1230.19	1231.25
1070.71	963.03
2580.72	2814.29
944.832	989.347
1122.47	1049.09
1378.28	1446.39
1482.04	1532.95
1079.03	1067.56
829.581	802.257
1391.8	1445.13
2248.16	2126.9
975.752	947.187
2568.57	2602.79
995.412	958.999
1194.43	1163.68
1226.35	1143.96
965.429	957.119
2232.71	2180.89
1098.07	1037.95
1345.13	1300.33
1810.55	1715.54
777.619	831.315
1995.37	1928.24
1369.96	1393.83
810.85	864.52
882.426	850.638
854.75	886.739
1055.39	1029.91
1342.55	1333.31
794.116	789.019
1143.42	1135.18
1058.2	1080.6
1404.33	1341.43
1303	1220.05
1369.05	1426.49
1575.04	1529.39
3255.12	3204.61
1568.57	1566.22
1261.28	1217.59
1669.21	1696.79
1151.97	1141.61
1125.99	1072.05
1088.19	1148.37
1209.32	1268.33
1082.31	997.067
964.944	954.601
913.893	906.846
929.725	874.869
1270.89	1222.32
1275.37	1273.21
1167.03	1117.22
1462.16	1384.97
1095.78	1087.36
1459.78	1430.18
1201.3	1104.18
919.025	863.627
1517.77	1515.58
1125.71	1097.34
1716.21	1662.08
924.983	909.35
710.451	793.039
656.231	591.385
1382.63	1409.36
1135.69	1139.4
1114.14	1080.42
1181.06	1211.96
1399.88	1464.82
1099.91	1139.16
1123.91	1176.75
1167.72	1226.15
1137.65	1117.18
1334.36	1144.27
1057.17	1042.95
1436.71	1348.12
1557.26	1582.66
1444.43	1432.15
1563.51	1475.27
906.081	892.876
1390.31	1398.38
944.748	999.427
651.539	822.161
1086.83	1067.39
1114.27	1259.63
751.594	703.835
1852.06	1814.43
1166.9	1180.04
897.117	829.473
1447.56	1353.38
1294.65	1255.19
746.565	744.301
659.762	675.182
920.379	935.187
1354.18	1462.13
2826.2	2738.36
1193.43	1239.52
2364.75	2309.21
860.033	888.008
1968.08	2010.12
1230.53	1182.28
1009.75	1061.55
711.517	749.854
919.43	907.593
2523.54	2435.12
2190.41	2226.48
1370.74	1361.19
1101	1102.01
1333.12	1416.6
1529.31	1480.75
1554.09	1627.23
1192.78	1111.71
2024.9	1992.05
1348.34	1372.92
1194.21	1233.33
1041.14	986.574
1164.33	1099.84
861.186	868.746
1083.71	1082.08
905.357	930.548
820.667	809.535
699.836	717.471
1042.58	973.151
764.24	722.37
964.049	973.974
943.325	1004.57
2667.36	2564.99
1496.27	1456.39
2876.69	2743.99
1023.21	956.929
941.008	929.695
923.694	889.629
867.923	837.681
1611.38	1518.41
1206.84	1302.73
1370.2	1305.59
985.556	944.026
2348.24	2285.59
1088.78	1065.26
1398.92	1336.23
970.908	944.688
2330.41	2317.02
1515.29	1596.94
1108.32	997.992
1177.77	1191.34
1000.37	983.499
1304.06	1355.59
1086.56	1129.07
1262.62	1336.41
1130.31	1063.1
2126.44	2190.03
858.81	983.816
1990.75	2088.1
1281.19	1259.52
1337.79	1321.98
1177.27	1202.31
1361.23	1299.63
1413.77	1364.76
763	749.302
779.136	664.512
699.838	762.991
1094.55	1053
1824.36	1715.68
751.426	708.105
630.888	570.719
694.084	534.618
831.777	845.491
1950.93	1941.74
1111.12	1101.23
948.077	944.777
854.344	866.224
792.094	739.539
898.739	851.832
804.804	767.756
2396.74	2406.15
1290.13	1322.57
4599.2	4594.12
779.905	812.379
793.108	768.43
889.434	918.177
806.411	797.23
1980.16	1916.52
1014.86	935.757
1096.78	1158.84
911.489	944.114
1085.98	1103.13
1075.07	1054.32
1260.98	1162.87
1031.47	1165.28
901.705	925.167
451.638	484.226
615.796	602.281
1403.81	1372.06
975.81	966.986
1756.65	1662.46
890.452	1214.75
1274.02	1256.21
1235.25	1194.88
1205.68	1241.99
1348.09	1310.68
537.297	545.591
1401.06	1358.71
1181.46	1167.66
1152.23	1130.7
1321.98	1295.38
1515.71	1588.21
1353.41	1347.73
1692.93	1715.57
903.48	772.686
877.739	909.715
1080.32	1075.56
948.915	938.618
887.513	884.986
550.544	651.226
4552.12	4597.95
926.485	992.18
1081.12	1125.65
1038.99	1010
1236.29	1184.36
758.761	797.087
916.211	935.419
1120.67	1098.02
1176.13	1143.64
1342.39	1335.99
1136.69	1332.16
1105.97	1110.87
1725.34	1730.91
793.752	840.586
934.749	908.432
1181	1227.73
829.737	841.347
2302.73	2191.86
1662.95	1704.08
1285.11	1233.74
1249.02	1209.68
1129.16	1095.22
992.292	973.882
1003.92	1062.55
855.498	816.723
1378.77	1281.62
861.105	845.781
856.568	844.232
1228.14	1223.33
858.392	865.507
935.42	982.61
999.283	1021.58
987.66	1002.42
1118.41	1020.45
1479.31	1419.71
1213.26	1262.4
514.163	553.259
1236.22	1231.04
1419.6	1339.06
1143.95	1120.29
1340.86	1313.52
1222.08	1238.16
880.288	858.088
1130.66	1070.19
860.718	889.098
574.092	590.593
867.011	808.748
764.317	841.629
1278.63	1161.85
1467.51	1446.99
1282.63	1303.51
881.337	925.665
1221.52	1159.99
2600.46	2538.85
1409.94	1276.41
1121.91	1125.79
1212.12	1275.99
1407.8	1315
1488.71	1472.08
1178.07	1175.89
2104.31	2068.64
1102.6	1082.17
1742.6	1770.44
1521.58	1517.03
1560.28	1599.47
1276.96	1283.28
984.908	999.547
1041.94	985.159
1603.36	1642.19
974.955	996.398
1046.02	1052.98
740.868	790.29
975.847	915.094
962.561	946.081
1098.25	1137.8
1168.95	1070.55
1222.69	1204.87
1166.08	1250.81
1372.75	1415.72
743.883	713.809
1213.01	1273.18
920.057	872.365
1224.6	1245.44
1256.52	1207.37
1285.31	1254.56
1214.52	1139.46
2471.95	2457.12
2188.31	2258.46
1788.89	1821.9
736.06	727.699
1032.53	1044.59
1226.35	1263.91
918.715	1001.94
597.48	543.82
658.564	671.022
1407.11	1454.64
942.681	1006.76
923.716	1014.04
3297.42	3396.8
910.849	906.023
871.174	935.781
2627.93	2536.4
903.602	951.948
1375.9	1361.75
926.793	903.36
1069.86	1011.83
1050.37	1082.28
1550.44	1478.35
982.57	978.237
968.428	946.619
1019.23	954.03
765.527	810.988
845.456	856.872
1102.04	1052.63
1964.19	1981.07
1991.52	2086.61
1094.17	1091.43
1604.01	1574.7
2104.93	1990.08
1192.54	1143.62
1386.3	1394.21
790.906	756.576
598.111	528.642
1296.03	1199.03
1260.95	1232.3
1284.97	1228.5
1354.64	1285.83
1339.59	1270.19
3111.78	2967.96
1141.02	1188.93
1455.02	1398
1267.31	1231.37
1202.46	1151.98
1474.88	1471.58
1133.81	1191.53
1103.71	1089.49
1650.62	1542.44
914.246	925.319
880.312	962.01
709.751	800.761
556.544	575.739
520.483	521.787
1021.92	1062.31
2137.42	2128.1
946.51	913.758
1892.43	1831.39
3435.6	3158.21
865.186	888.726
1066.69	1114.53
2263.12	2356.21
1011.69	904.024
1131.96	1223.94
928.181	885.761
1038.19	1001.32
955.045	929.891
2230.69	2272.19
1234.78	1219.82
703.441	738.669
1264.33	1220.98
1058.37	1098.22
738.089	709.86
2422.07	2557.82
1331.3	1346.9
2072.04	2028.06
983.729	961.691
472.994	522.573
2806.05	2736.61
1308.13	1260.83
887.739	843.817
772.067	788.238
829.938	795.742
1643.03	1669.11
967.058	950.787
531.82	631.7
753.562	751.534
751.148	770.857
2768.74	2754.91
677.018	655.209
910.561	941.046
674.544	626.164
1090.97	1035.77
1558.51	1513.8
1051.73	1007.95
1506.27	1410.72
923.751	878.631
841.168	890.792
1397.74	1324.13
1400.74	1392.33
1133.67	1073.03
1347.84	1403.44
1339.56	1306.33
1313.35	1380.63
1383.92	1321.5
1362.85	1392.39
1201.39	1228.63
1198.22	1263.13
1188.82	1219.14
1093.01	1192.1
1494.28	1478.38
1163.82	1267.73
1341.83	1354.77
1366.99	1316.47
1279.71	1192.94
1453.95	1436.2
1380.8	1223.65
883.79	852.697
987.535	937.541
1123.61	1145.08
1980.19	2079.96
950.596	950.326
1476.66	1356.22
1361.91	1344.2
897.791	894.417
861.372	854.399
2654.87	2762.18
980.747	1012.5
822.318	805.661
1263.52	1291.7
1186.9	1159.68
1476.66	1401.69
839.943	832.828
1706.73	1807.63
997.424	926.016
3045.46	2928.88
690.844	719.249
778.879	762.699
671.588	649.844
740.947	777.679
1626.13	1591
1562.66	1537.89
1125.77	1082.94
627.971	614.047
945.253	999.056
2122.2	2188.32
3328.8	3294.79
868.502	874.264
1574.28	1516.21
754.811	754.635
357.125	342.242
298.582	273.064
938.856	884.736
847.246	830.417
804.635	782.946
55159.7	54838.3
672.863	726.173
688.837	626.723
630.994	609.368
[truncated: 20 more columns]

## Sheet: Table DR1
Stowell, H.H., Schwartz, J.J., Klepeis, K.A., Hout, C., Tulloch, A.J., and Koenig, A., 2017, Sm-Nd garnet ages for granulite and eclogite in the Breaksea Orthogneiss and widespread granulite facies metamorphism of the lower crust, Fiordland magmatic arc, New Zealand: Lithosphere, doi:10.1130/L662.1.
GSA Data Repository Item 2017338
TABLE DR1. SELECT TRACE CONCENTRATIONS (PPM) IN GARNET FROM SAMPLE 12NZ04B, BREAKSEA SOUND AREA, FIORDLAND NZ
Distance (um)	Ti	Y	La	Ce	Pr	Nd	Sm	Eu	Gd	Tb	Dy	Ho	Er	Tm	Yb	Lu
715.9	1026.24	60.0839	0.0225452	0.342981	0.142969	2.68044	3.24273	1.6889	8.15987	1.45122	10.6785	2.10058	6.33131	0.945708	5.86408	0.944069
859.08	1224.58	55.4674	0.0491413	0.194237	0.206929	2.74261	3.54781	1.82288	8.0509	1.39683	11.1373	1.96871	6.64941	0.766385	6.25039	0.819009
1002.26	2319.48	64.3326	0.0894393	0.146287	0.111044	2.70032	3.29728	1.75056	8.23672	1.48702	10.599	2.22762	6.41571	0.994991	6.07803	0.973158
1145.44	1258.6	54.9772	0.00161987	0.155822	0.147572	2.91369	3.28259	1.578	8.10915	1.50684	9.26405	2.12248	5.98349	0.957126	6.61625	0.728551
1288.62	2245.39	56.6703	0.0343023	0.248127	0.0876846	2.44835	2.7717	1.49247	7.4099	1.57901	10.5941	2.30327	6.6471	0.919136	6.79978	0.901424
1431.8	1180.35	57.7944	0.0412534	0.131667	0.12572	2.49835	3.7145	1.48941	7.09112	1.41372	10.7458	2.11666	6.40763	0.935463	5.78001	0.976533
1574.98	1459.49	54.8905	0.0121567	0.164313	0.168958	1.97258	3.36805	1.53416	7.26581	1.34546	9.96203	2.12387	6.18291	0.960852	5.61544	0.84278
1718.16	inc.	inc.	inc.	inc.	inc.	inc.	inc.	inc.	inc.	inc.	inc.	inc.	inc.	inc.	inc.	inc.
1861.34	inc.	inc.	inc.	inc.	inc.	inc.	inc.	inc.	inc.	inc.	inc.	inc.	inc.	inc.	inc.	inc.
2004.52	1067.74	58.7124	0.293592	0.788467	0.169741	2.3546	3.03348	1.45276	8.04195	1.51566	10.5928	2.35522	6.66494	0.984639	5.89815	0.897218
2147.7	1189.29	56.5819	0.0242697	0.210314	0.10818	2.00102	3.49471	1.38873	7.86967	1.45622	9.75398	2.18023	6.73004	0.883544	5.37331	0.683181
2290.88	1406.13	54.6608	0	0.214291	0.1539	2.72993	2.8495	1.69822	6.91617	1.26836	9.70723	2.0277	5.71973	0.659273	5.20163	0.712929
2434.06	1063.87	52.3617	0.0241409	0.208716	0.113515	3.03727	2.89436	1.47778	6.94956	1.40206	9.84958	1.92864	5.92658	0.755372	5.06054	0.765958
2577.24	3005.04	60.5395	0.0561734	0.0397198	0.0165568	2.56189	3.63822	1.49453	8.2928	1.51571	12.7308	2.24148	6.59513	0.526765	6.74813	0.866464
2720.42	1252.04	63.3281	0.0246816	0.139659	0.172093	2.25835	3.378	1.72927	8.24057	1.33023	10.6664	2.1087	6.45324	0.8247	5.54085	0.903782
2863.6	1139.29	60.8717	0	0.120745	0.139176	2.95749	3.97218	1.64084	8.20495	1.42835	10.7727	2.32751	6.48304	1.03212	5.51593	0.841256
3006.78	1038.54	59.7847	0.0683871	0.149354	0.140979	2.85825	3.72292	1.58028	6.84134	1.48538	10.9447	2.24045	6.7493	0.845928	6.47449	0.890174
3149.96	1082.74	56.3095	0	0.484165	0.153696	3.06406	3.30376	1.57129	7.32447	1.32315	10.466	2.12972	6.2337	0.942525	6.37201	0.950147
3293.14	1121.63	61.5098	0.00558845	0.206738	0.144226	1.87644	3.40502	1.54566	7.77321	1.51504	11.7244	2.44813	7.44709	0.978402	6.75003	1.08757
3436.32	1182.48	61.1686	0.00496921	0.110004	0.116721	2.2115	2.97004	1.46367	8.16925	1.48955	10.4171	2.39661	6.96943	1.00814	6.20079	0.982898
3579.5	1063.26	53.4051	0.0740599	0.168671	0.0828374	2.15924	3.02111	1.47838	7.13309	1.3252	10.6306	2.08823	6.06156	0.838945	6.28376	0.891969
3722.68	1084.8	59.5001	0	0.246837	0.117962	2.47701	2.83097	1.47793	6.42598	1.49943	10.3082	2.08637	6.74965	0.947555	5.70577	1.04578
3865.86	945.959	64.8404	0.0385959	0.155673	0.100126	2.31905	3.15649	1.31533	7.29661	1.55069	9.31381	2.33799	7.01658	0.962705	6.47673	1.04198
4009.04	inc.	inc.	inc.	inc.	inc.	inc.	inc.	inc.	inc.	inc.	inc.	inc.	inc.	inc.	inc.	inc.
4152.22	inc.	inc.	inc.	inc.	inc.	inc.	inc.	inc.	inc.	inc.	inc.	inc.	inc.	inc.	inc.	inc.
4295.4	732.218	59.036	0.0666255	0.580856	0.0849032	1.7794	3.64775	1.61867	6.41616	1.42417	9.60508	2.34464	6.04963	0.887008	7.22153	1.10274
4438.58	984.373	64.6104	0.736301	2.72293	0.369976	2.43107	1.87562	1.26891	5.5498	1.39111	9.97205	2.7131	7.99885	0.926293	8.29814	1.13954
4581.76	1035.35	59.0825	0.0236515	0.222124	0.158727	1.82449	2.95615	1.45669	6.5878	1.31372	11.1151	2.37644	7.6178	1.04793	7.23625	1.29247
4724.94	inc.	inc.	inc.	inc.	inc.	inc.	inc.	inc.	inc.	inc.	inc.	inc.	inc.	inc.	inc.	inc.
4868.12	1016.38	63.7245	0.273493	0.618063	0.141563	2.30351	3.15713	1.29149	7.24614	1.62828	11.9372	2.23013	7.89497	1.1921	7.88154	1.15791
5011.3	1214.8	69.8167	0.0335305	0.226826	0.140363	2.62438	3.64465	1.76426	7.91475	1.65306	12.2896	2.41397	7.2391	1.20163	8.4044	1.11758
5154.48	871.28	63.0282	0.382314	0.558152	0.136343	3.16152	2.6139	1.76562	7.7775	1.60449	11.6353	2.32988	7.75097	1.03893	6.07173	1.04475
5297.66	3510.38	78.8216	0.15005	0.334326	0.122878	2.6848	3.9735	1.23784	8.58364	1.51193	12.3842	2.4604	8.54358	1.17266	6.60862	1.10612
5440.84	1457.91	68.3825	0.011465	0.147732	0.138123	2.74748	3.4514	1.5937	7.83465	1.54043	11.1957	2.29768	7.44637	1.05507	7.13552	1.16357
5584.02	1001.04	64.4213	0	0.285309	0.119734	2.67273	4.23871	1.66	8.02364	1.46798	11.4793	2.61087	7.70797	1.12734	6.83117	1.18536
5727.2	1061.58	64.2298	0.623324	1.04186	0.297273	2.67416	3.46499	1.42418	7.99494	1.5907	11.7332	2.62276	7.02125	1.13639	7.60369	1.05473
5870.38	1195.53	62.1122	0.0194546	0.14752	0.159706	2.68547	2.99707	1.54568	8.94559	1.55425	12.2322	2.52395	7.64268	1.05761	7.4162	1.32924
6013.56	1292.18	77.973	0.0937586	0.291573	0.123644	2.62511	3.85295	1.61619	8.40061	1.847	12.9147	2.68876	8.03278	1.0274	7.77345	1.22595
6156.74	1523.1	64.3881	0.0237756	0.25778	0.138119	1.83914	2.80186	1.46419	7.32695	1.4239	10.4049	2.23923	5.9633	1.02569	6.92399	1.03715
6299.92	1169.6	72.2224	0.0210956	0.239227	0.164608	2.34046	4.16133	1.56821	8.02447	1.68043	10.9326	2.68075	7.59829	1.1294	7.98334	1.20949
6443.1	1263.44	68.1239	0.0781072	0.216801	0.114388	1.87685	3.34417	1.2791	8.11853	1.71687	12.1379	2.45377	7.54474	0.951096	7.52943	1.22547
6586.28	563.809	70.3513	0.164559	0.658941	0.155941	2.50309	3.45758	1.39731	9.05797	1.52584	11.8214	2.49995	7.12806	1.06124	7.65119	1.17652
6729.46	4033.65	65.1205	0.131506	0.46946	0.16825	1.92123	3.40013	1.51722	8.03893	1.49998	10.4837	2.44484	7.62838	1.03789	7.6846	1.01281
6872.64	1444.19	69.5807	0.124649	0.446791	0.253785	2.07633	3.69657	1.56313	8.72442	1.60033	11.2544	2.49521	7.5363	1.0353	7.15251	1.09843
7015.82	954.446	66.9216	0.0913836	0.186564	0.108764	2.77723	3.69434	1.44736	7.3247	1.55974	10.3954	2.40451	7.23922	0.944246	7.05816	1.21615
7159	1672.71	69.4937	0.0531748	0.20366	0.102319	2.13794	3.10136	1.54976	7.68432	1.45531	11.3697	2.55027	6.64676	1.06883	7.44686	1.08947
7302.18	1164.48	69.8186	0.0732352	0.17591	0.149768	2.62629	4.09707	1.57638	8.69026	1.66276	11.014	2.63793	7.7852	1.18887	6.82717	1.06765
7445.36	1699.82	67.8644	0.00820565	0.141028	0.106835	2.81337	3.62561	1.62268	7.93734	1.64392	11.1619	2.44197	7.52142	0.993934	7.03885	1.12975
7588.54	1024.02	68.5565	0.0474222	0.165812	0.151114	3.43289	3.70505	1.70727	7.72152	1.57634	11.1055	2.48367	7.69772	1.1507	7.18166	1.11023
7731.72	1101.57	66.6061	0.0194048	0.243724	0.0645323	3.3908	3.77873	1.45737	7.00538	1.58142	13.3621	2.46673	7.51276	0.997777	7.01783	1.18962
7874.9	794.092	66.4162	0.0189501	0.189662	0.156415	2.69665	3.77796	1.52237	8.68564	1.4573	12.681	2.78032	7.52384	1.05007	8.39216	1.02873
8018.08	2241.63	65.9428	0.0145403	0.169107	0.201687	2.95837	3.38051	1.50763	7.75077	1.59307	11.5573	2.35392	7.52242	1.15065	8.03998	1.17197
8161.26	1230.28	68.3435	0.0895804	0.254393	0.173118	2.94608	3.35053	1.53942	8.40442	1.41251	11.0019	2.29327	6.73792	1.04293	7.38047	0.97602
8304.44	883.416	68.465	0	0.109136	0.166465	3.37813	3.61232	1.69761	7.98344	1.69063	11.3019	2.43628	7.3792	1.00983	7.40831	1.1573
8447.62	1365.66	71.5017	0.163998	0.368086	0.257152	3.29891	2.89514	1.32267	8.7332	1.70375	11.7812	2.37728	7.46832	1.1001	6.6628	1.07684
8590.8	914.287	65.0673	0.001126	0.137098	0.238039	3.34888	2.27615	1.5562	8.25382	1.68953	11.6246	2.61698	8.22868	1.01566	7.85652	1.21505
8733.98	1568.65	68.3951	0.00138867	0.133797	0.201829	2.28367	3.38072	1.50536	8.82098	1.51216	11.6173	2.61923	7.67821	1.01048	7.8966	1.12103
8877.16	1179.26	67.7366	0.0368055	0.155063	0.25422	3.00449	4.34265	1.55389	8.33847	1.64088	11.8733	2.49016	7.52227	1.00872	8.79191	1.21256
9020.34	1200.61	67.6335	0.0422684	0.123174	0.10439	3.07467	4.0822	1.65337	8.02779	1.42724	11.6108	2.48083	7.55309	1.10076	7.32233	0.983254
9163.52	1029.85	63.9464	0.0435469	0.167913	0.14174	3.30434	3.56922	1.64073	7.47617	1.62763	11.8632	2.50614	7.71049	1.12602	7.27857	1.07883
9306.7	1677.98	67.8548	0.0167739	0.170544	0.168564	2.74204	3.03841	1.57865	7.5529	1.62337	11.8675	2.48554	7.6633	1.14241	6.17326	1.12488
9449.88	1242.29	64.4629	0.0491985	0.214069	0.191559	2.81148	3.81105	1.56117	8.37704	1.41685	10.6678	2.39118	7.58823	1.00243	6.83981	0.968224
9593.06	1314.45	62.942	0.0286935	0.171123	0.131802	2.98017	4.08818	1.56989	9.3238	1.49558	10.4519	2.24215	6.63035	0.960397	6.04112	1.08979
9736.24	1242.65	60.1084	0	0.247805	0.11386	2.93046	3.55041	1.73915	7.68013	1.5892	9.72835	2.23113	6.70386	0.747593	6.29481	1.0489
9879.42	1458.66	57.4598	0.0131813	0.268856	0.187383	3.18162	3.81865	1.46133	8.12171	1.53391	10.3579	2.14026	6.51223	0.767927	6.4687	0.751338
10022.6	1157.89	56.6186	0	0.146709	0.0771713	3.36234	3.41759	1.84426	7.14694	1.43311	10.2947	2.36059	6.64877	0.87994	5.91239	0.797288
10165.8	1249.08	57.6095	0.00759888	0.133312	0.139964	3.06007	3.56561	1.62567	7.12905	1.39338	10.4014	2.12226	6.3187	0.87898	6.3279	0.572747
10309	1190.82	64.4746	0	0.183962	0.151917	2.93996	3.67912	1.66462	7.43285	1.44429	10.3951	2.18213	6.64303	0.935785	5.89177	0.883873
10452.1	1445.27	62.6663	0.0183821	0.0883736	0.107087	2.69473	3.7448	1.90138	8.02531	1.4623	9.93207	2.16529	6.27494	0.810688	5.97708	0.881324
10595.3	1132.83	60.0408	0.13421	0.152757	0.188874	2.59616	3.49014	1.52803	7.37225	1.3123	10.0631	2.21967	6.27171	0.674612	6.62311	0.743786
10738.5	1343.1	59.6746	0.0389479	0.181827	0.101818	2.36488	4.25687	1.58389	7.92829	1.55024	10.1171	2.21207	6.79295	0.829525	6.60809	0.855281
10881.7	974.875	62.5976	0	0.156496	0.088116	2.39077	3.64151	1.55536	7.60288	1.50096	10.3933	2.24991	6.96665	0.820608	6.88641	0.8828
inc. = analysis removed due to obvious contamination from inclusion minerals

## Sheet: Table DR2
Stowell, H.H., Schwartz, J.J., Klepeis, K.A., Hout, C., Tulloch, A.J., and Koenig, A., 2017, Sm-Nd garnet ages for granulite and eclogite in the Breaksea Orthogneiss and widespread granulite facies metamorphism of the lower crust, Fiordland magmatic arc, New Zealand: Lithosphere, doi:10.1130/L662.1.
GSA Data Repository Item 2017338
TABLE DR2. GARNET CLOSURE TEMPERATURE ESTIMATES, BREAKSEA SOUND AREA, FIORDLAND NZ
Garnet grain radius (cm)	0.2	0.3	0.4	0.5
Cooling rate (C/m.y.)	-10	-10	-10	-10
Tclosure C*!	899	952	984	1028
Cooling rate (C/m.y.)	-5	-5	-5	-5
Tclosure C*!	874	925	956	998
* calculated from equations in Dodson (1973)
! Diffusion coefficients calculated by the methods presented in Carlson (2012)
